# Supplementary material
Source: HighWire-hosted journal article supplement (https://bmjpaedsopen.bmj.com/content/7/1/e001712)
Supplement: inline-supplementary-material-3 [file inline-supplementary-material-3.pdf]

Supplementary Table 1.

| <b>Routine care group</b> |                        |                                                                            |
|---------------------------|------------------------|----------------------------------------------------------------------------|
|                           | <b>Gestational age</b> | <b>Reason</b>                                                              |
| 1                         | 30+5                   | Probiotic administration to mother                                         |
| 2                         | 30+6                   | Hospitalised to other hospital (suspected motor neuron disorder - SMA)     |
| 3                         | 26+1                   | Insufficient amount of MOBAM                                               |
| 4                         | 24+4                   | Hospitalised to other hospital (long-term artificial ventilation of lungs) |
| 5                         | 24+6                   | Hospitalised to other hospital (long-term artificial ventilation of lungs) |
| 6                         | 31+0                   | Hospitalised to other hospital (suspected congenital heart defect)         |
| <b>Intervention group</b> |                        |                                                                            |
|                           | <b>Gestational age</b> | <b>Reason</b>                                                              |
| 1                         | 31+0                   | Not hospitalised to single-family room during 48 hours of life             |
| 2                         | 30+0                   | Not hospitalised to single-family room during 48 hours of life             |
| 3                         | 24+4                   | Hospitalised to other hospital (long-term artificial ventilation of lungs) |

**In the routine care group** all eligible families agreed to participate in the study and we recruited them in the study in the order in which they were born.

Six babies dropped out from the study for the following reasons (Supplementary table ): four babies (gestational ages 30+6, 24+4, 24+6, 31+0 GW) were hospitalised to another hospital; the mother of one baby got probiotics and one mother had insufficient amount of own breast milk.

**In the intervention group** one family was excluded because they were afraid to make SSC to their premature baby (31+0 GW). Three families with eligible gestational age dropped out from the study. Two because the transition from open bay to single room failed during 48h of life: one family was ready to move at the 60<sup>th</sup> hour of life (newborns gestational age 31+0 GW) and the clinical condition of the mother of the second family (30+0 GW) didn't allow her to be treated separately (this decision came in cooperation with gynecologists). The third newborn (24+4 GW) was transferred to the other hospital.
